# Supplementary material
Source: PubMed Central journal article supplement (PMC11105186)

Fig S1

**a**

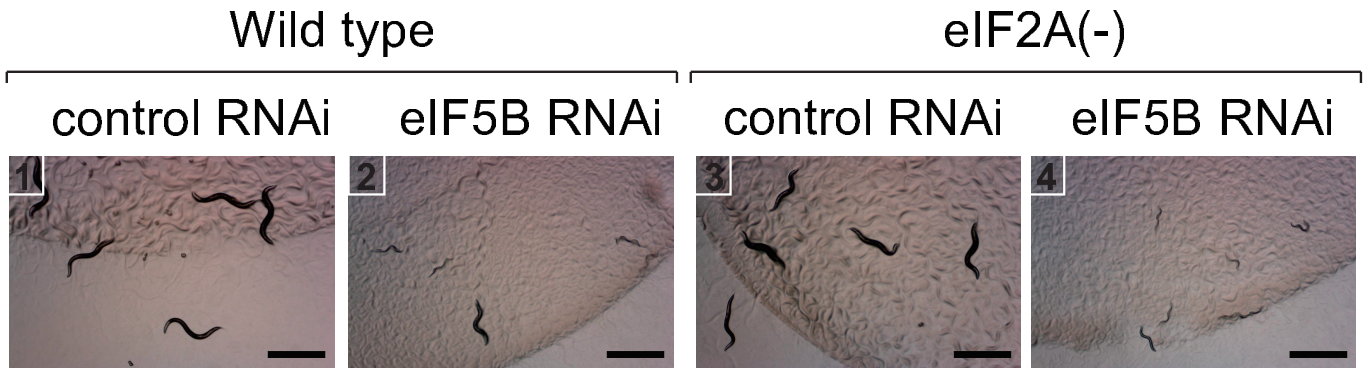

**b**

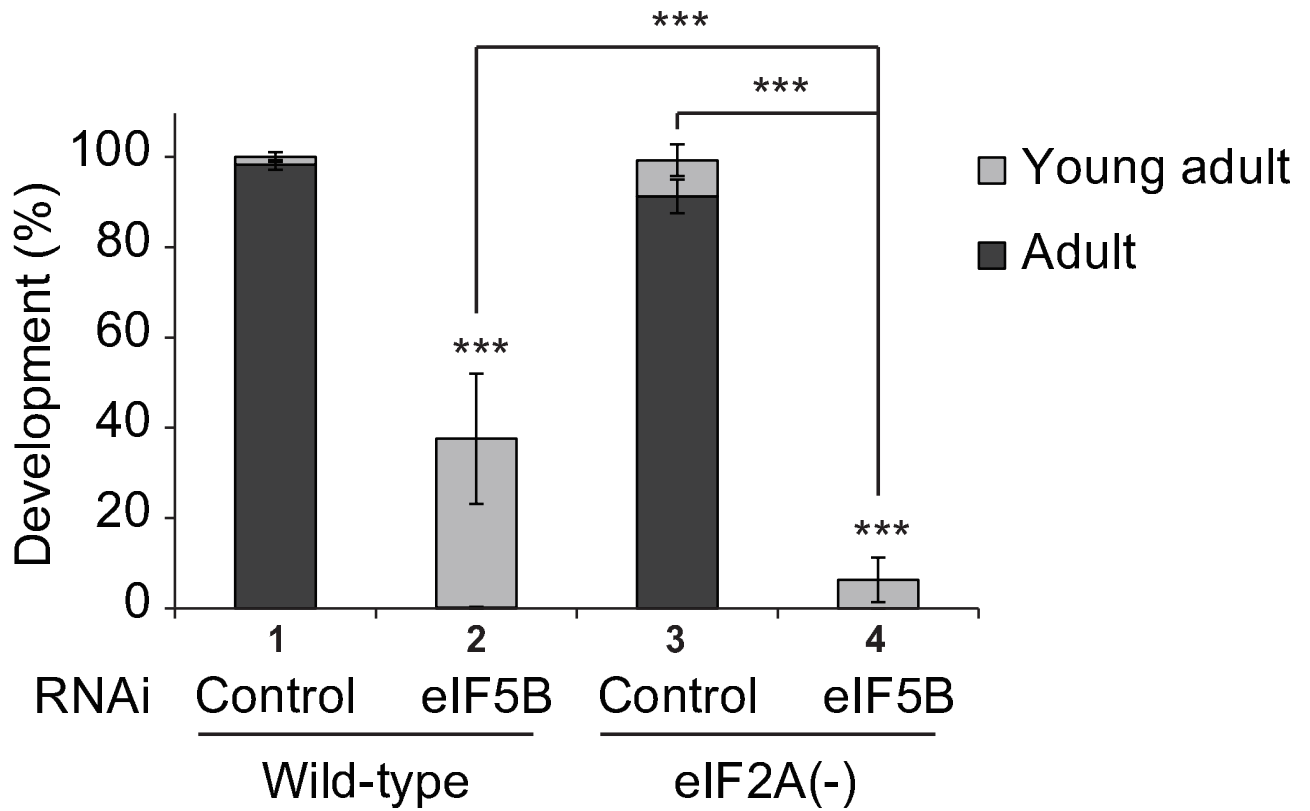

Fig S2

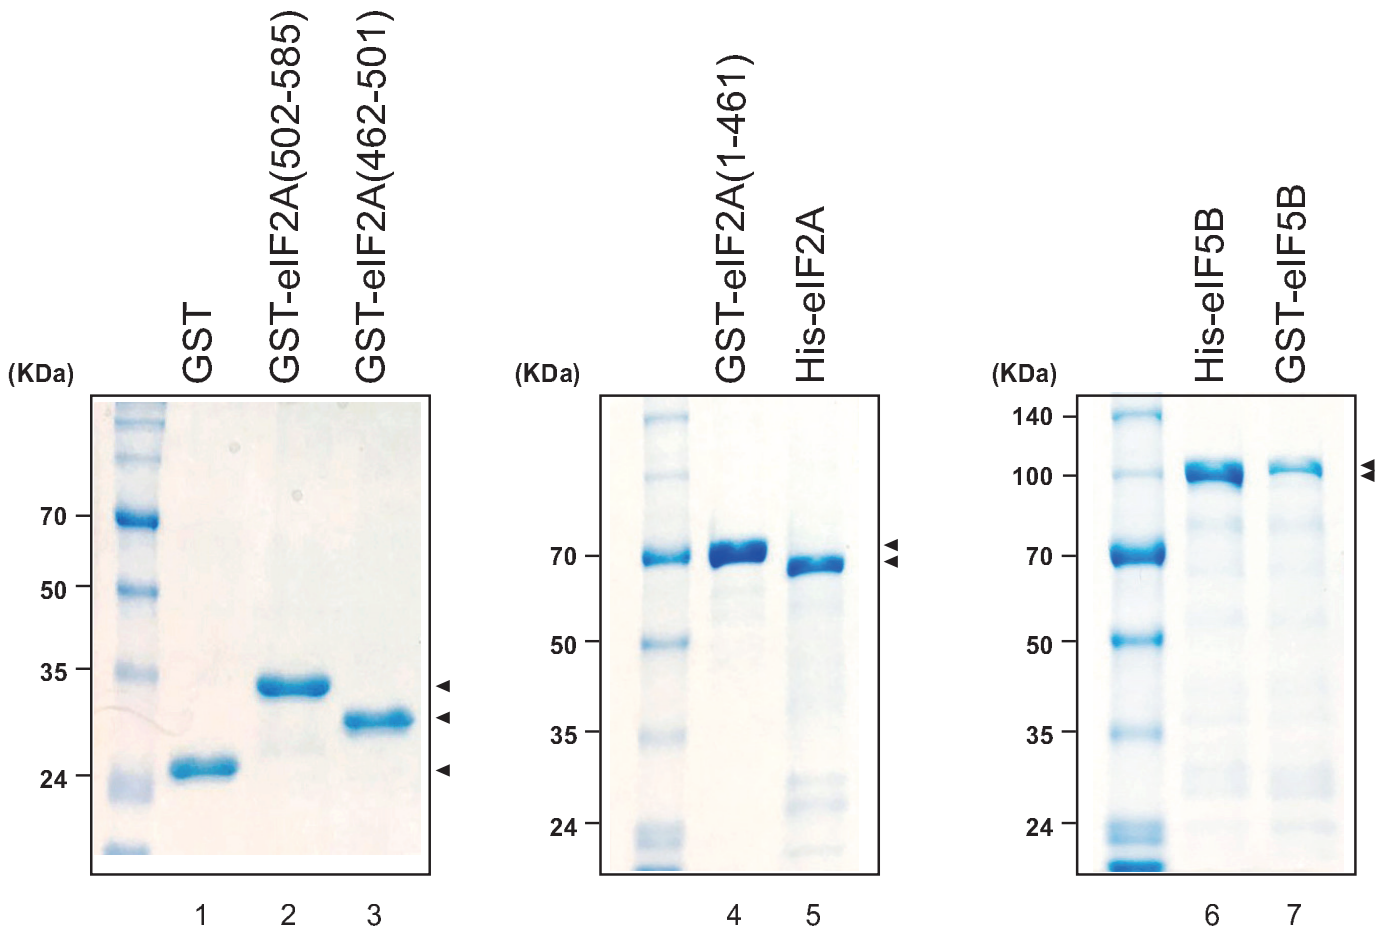





Fig S4

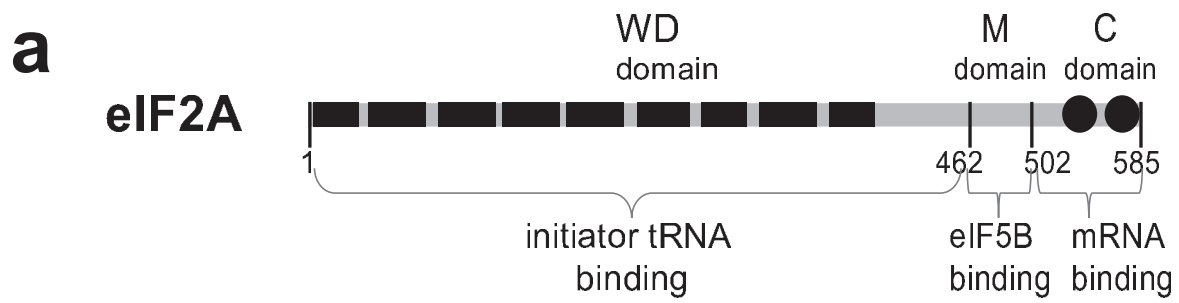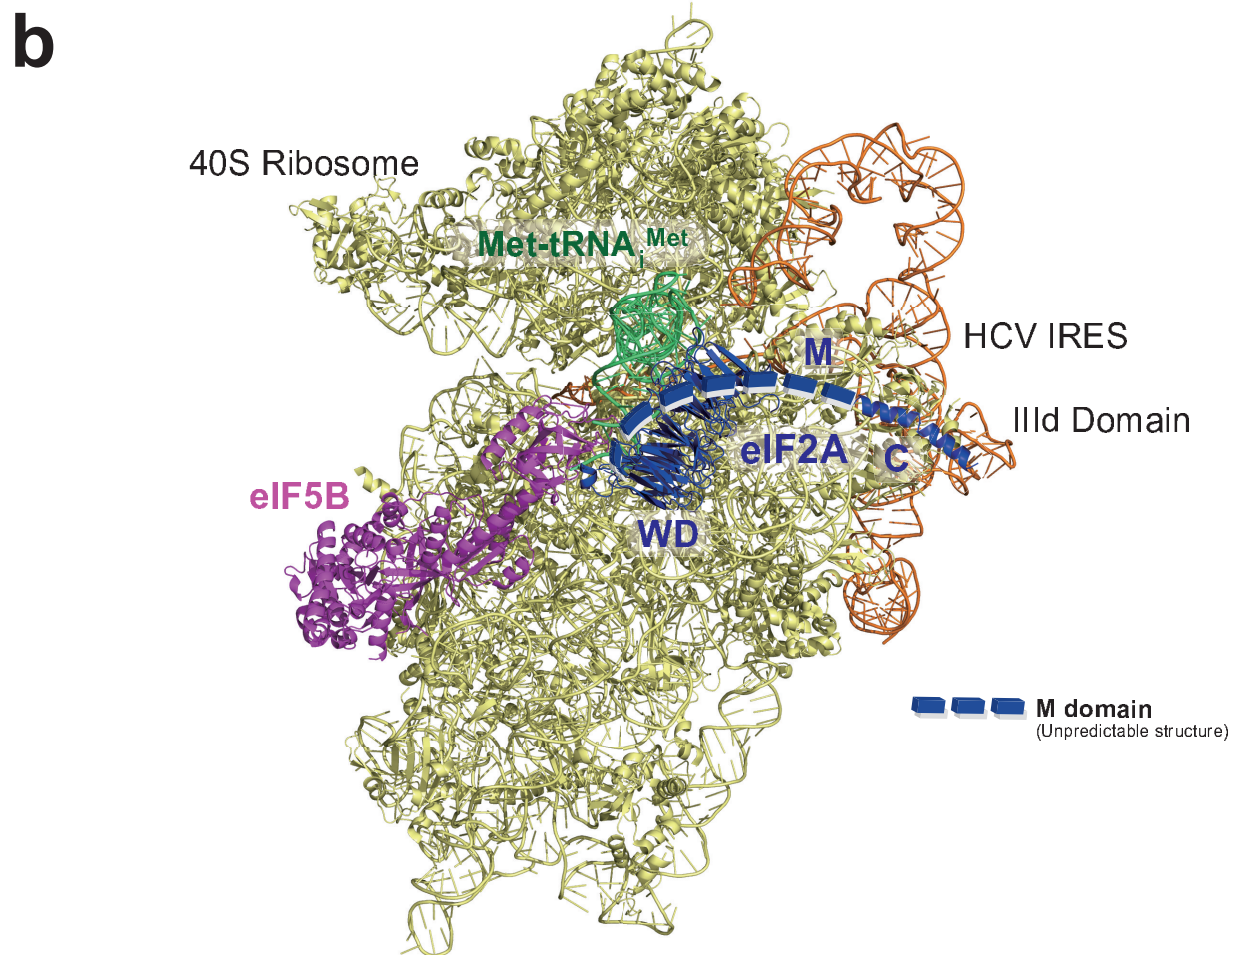

Fig S4

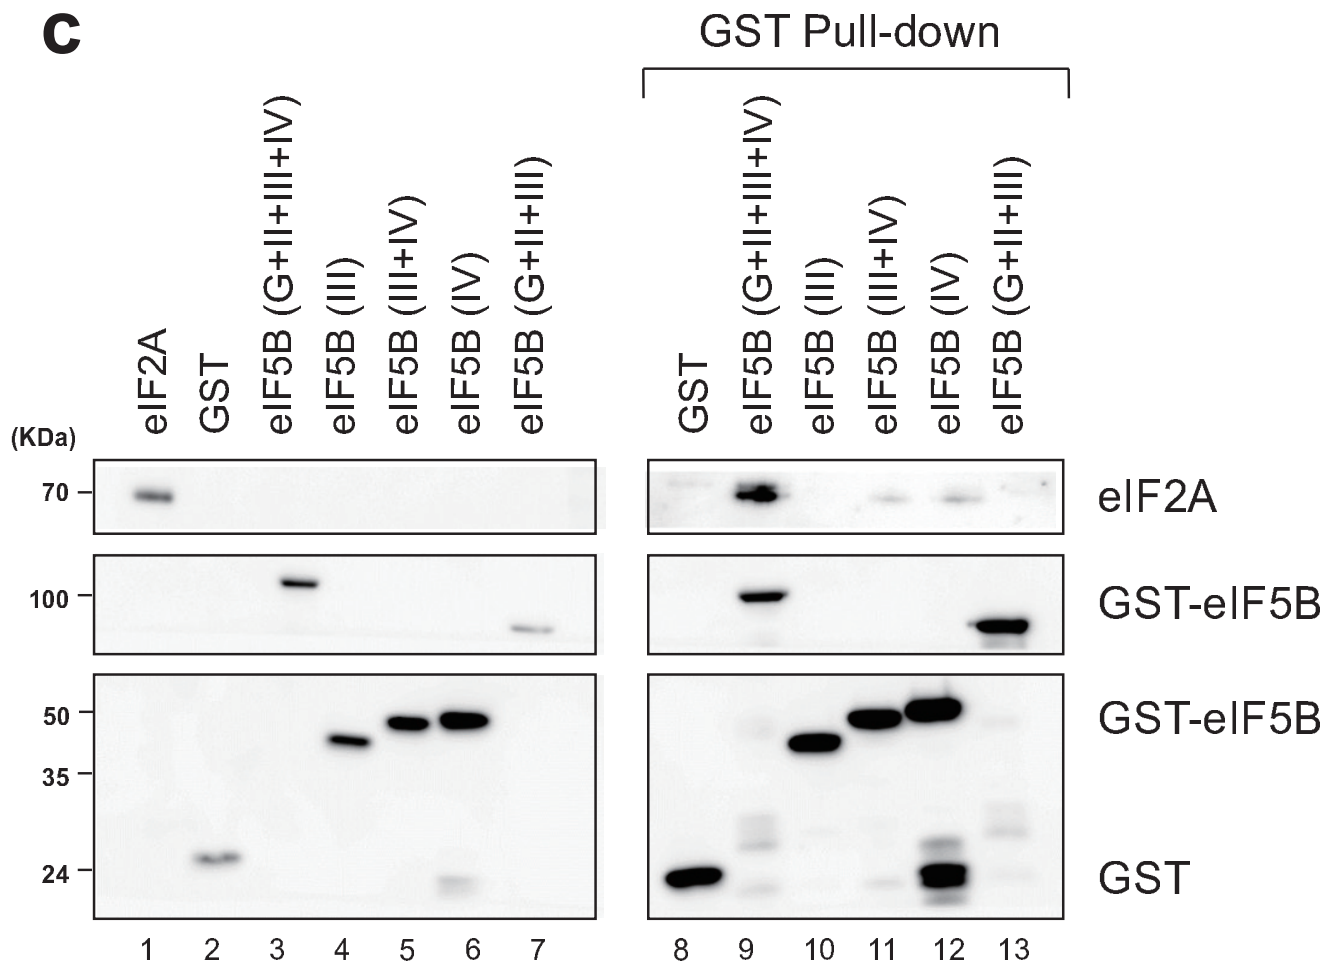



Fig S6

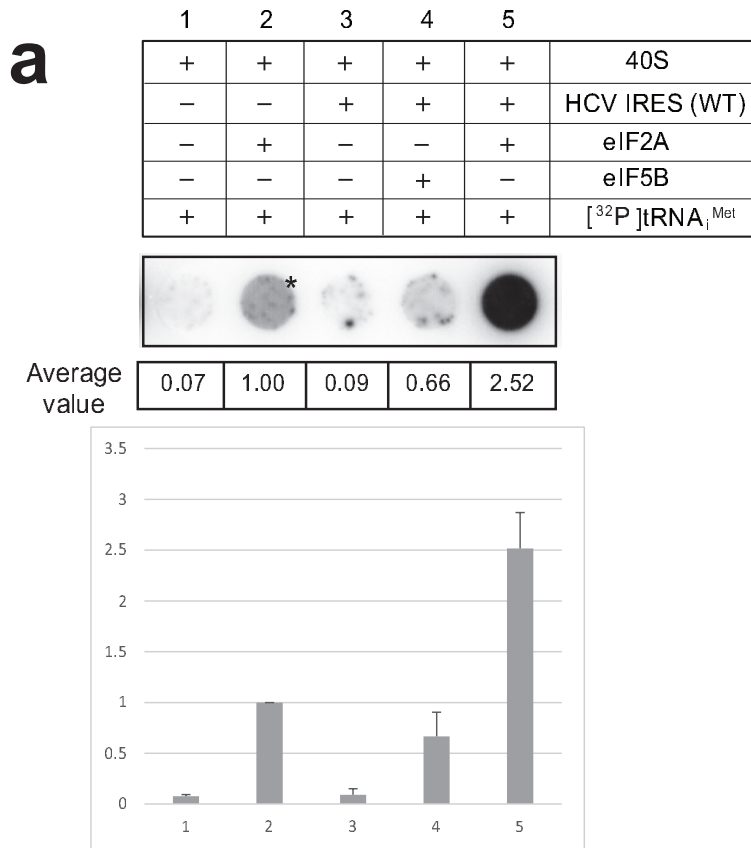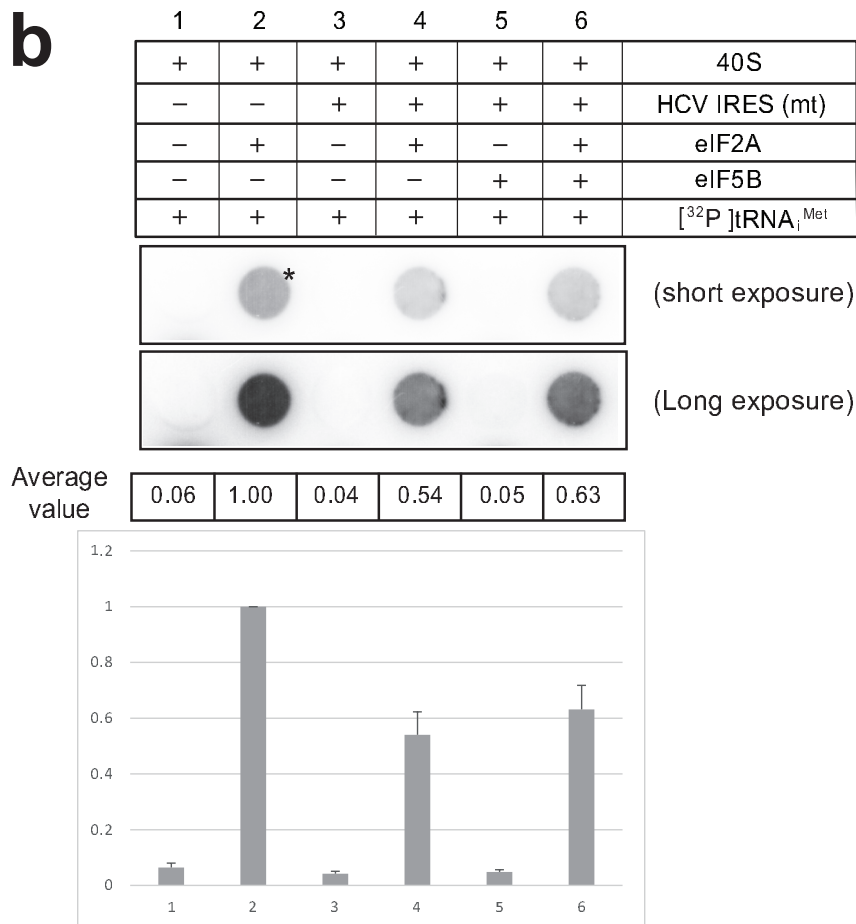

Fig S7

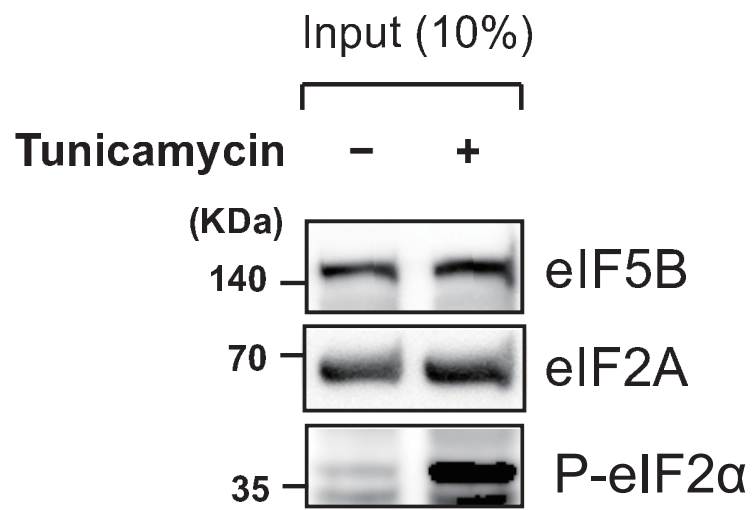



Fig S8

| 1 | 2 | 3 | 4 | 5 | 6 |                                                    |
|---|---|---|---|---|---|----------------------------------------------------|
| + | + | + | + | + | - | 40S                                                |
| - | - | - | + | + | + | HCV IRES                                           |
| - | + | - | + | - | + | eIF2A                                              |
| - | - | + | - | + | - | eIF2A(K567A)                                       |
| + | + | + | + | + | + | [ <sup>32</sup> P]tRNA <sub>i</sub> <sup>Met</sup> |

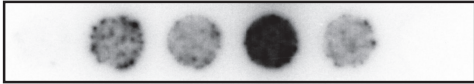

|               |      |      |      |      |      |      |
|---------------|------|------|------|------|------|------|
| Average value | 0.04 | 1.00 | 0.71 | 3.13 | 0.55 | 0.14 |
|---------------|------|------|------|------|------|------|

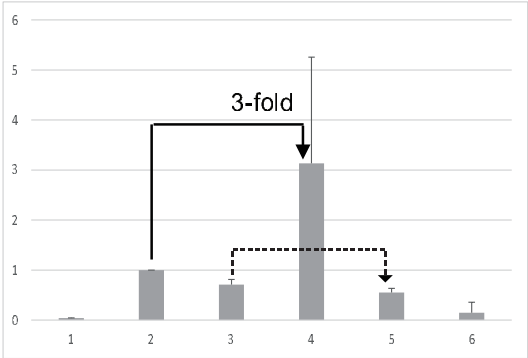

Supplement: 18_2018_2870_MOESM1_ESM.pdf [file 18_2018_2870_MOESM1_ESM.pdf]
